# Supplementary material
Source: PubMed Central journal article supplement (PMC4598019)
Supplement: jz5022087_si_001.pdf [file jz5022087_si_001.pdf]

# Supporting Information

*for*

## Qualitatively Incorrect Features in the TDDFT Spectrum of Thiophene-Based Compounds

Antonio Prlj,<sup>†</sup> Basile F. E. Curchod,<sup>\*,†,‡</sup> Alberto Fabrizio,<sup>†</sup> Leonard Floryan,<sup>†,§</sup> and Clémence

Corminboeuf<sup>\*,†</sup>

<sup>†</sup>Institut des Sciences et Ingénierie Chimiques, Ecole Polytechnique Fédérale de Lausanne, CH-

1015 Lausanne, Switzerland

<sup>‡</sup>Department of Chemistry, Stanford University, Stanford, California 94305, United States

<sup>§</sup>Departement Chemie und Angewandte Biowissenschaften, Eidgenössische Technische

Hochschule Zürich, CH-8093 Zürich, Switzerland

## Contents

Excitation energies of thiophene, dithienothiophene, thienothiophene and bithiophene

Plots of density differences

Structural data for ground and excited state geometries

Excitation energies and spectrum of terthiophene

Excited state geometries of bithiophene

Excitation energies of furan and furofuran

References

## **Excitation energies of thiophene, dithienothiophene, thienothiophene and bithiophene.**

**Table S1.** Excitation energies (in eV) and oscillator strengths (in parenthesis) of thiophene and dithienothiophene which are depicted in the Figure 2 of the main text. All the values are converged at cc-pVQZ level, except for EOM-CCSD of dithienothiophene (cc-pVTZ) and the CASPT2 results taken from the literature. We also list tuning parameters ( $\gamma$ ) of the range separated functional, the diagnostic parameters for ADC(2) and CC2 and available experimental absorption maxima.

|                                            | thiophene                            |                                      | dithienothiophene |                |
|--------------------------------------------|--------------------------------------|--------------------------------------|-------------------|----------------|
|                                            | B <sub>2</sub>                       | A <sub>1</sub>                       | B <sub>2</sub>    | A <sub>1</sub> |
| PBE                                        | 5.65 (0.073)                         | 5.63 (0.058)                         | 4.04 (0.305)      | 3.96 (0.059)   |
| B3LYP                                      | 5.69 (0.078)                         | 5.79 (0.074)                         | 4.21 (0.333)      | 4.38 (0.093)   |
| PBE0                                       | 5.79 (0.079)                         | 5.89 (0.079)                         | 4.31 (0.340)      | 4.50 (0.101)   |
| TDA(PBE0)                                  | 6.10 (0.104)                         | 6.02 (0.082)                         | 4.54 (0.476)      | 4.62 (0.130)   |
| M06                                        | 5.55 (0.070)                         | 5.77 (0.073)                         | 4.18 (0.303)      | 4.43 (0.097)   |
| M06-2X                                     | 5.92 (0.082)                         | 5.94 (0.096)                         | 4.52 (0.342)      | 4.77 (0.138)   |
| M06-2X (H <sub>2</sub> O, IEF-PCM)         | 5.87 (0.105)                         | 5.92 (0.134)                         |                   |                |
| ωB97x-D                                    | 5.81 (0.082)                         | 5.93 (0.090)                         | 4.46 (0.336)      | 4.79 (0.139)   |
| LC-PBE                                     | 5.98 (0.081)                         | 6.10 (0.113)                         |                   |                |
| LC-PBE*                                    | 5.95 (0.083)                         | 5.99 (0.104)                         | 4.64 (0.336)      | 4.97 (0.169)   |
| γ                                          | 0.38                                 |                                      | 0.37              |                |
| TDA-B2PLYP<br>(no perturbative correction) | 6.08                                 | 6.23                                 | 4.66              | 5.12           |
| TDA-B2PLYP                                 | 6.09 (0.106)                         | 5.83 (0.100)                         | 4.58 (0.461)      | 4.54 (0.169)   |
| TDHF                                       | 5.74 (0.075)                         | 6.47 (0.134)                         | 4.48 (0.299)      | 5.69 (0.213)   |
| CIS                                        | 6.08 (0.101)                         | 6.70 (0.150)                         | 4.79 (0.420)      | 5.91 (0.276)   |
| CIS(D)                                     | 6.30 (-)                             | 5.79 (-)                             | 4.93 (-)          | 4.61 (-)       |
| ADC(2)                                     | 6.12 (0.105)                         | 5.75 (0.093)                         | 4.67 (0.464)      | 4.59 (0.146)   |
| D <sub>1</sub>                             | 0.029                                |                                      | 0.031             |                |
| %doubles                                   | 7.26                                 | 9.45                                 | 10.1              | 11.6           |
| CC2                                        | 6.13 (0.094)                         | 5.78 (0.078)                         | 4.68 (0.411)      | 4.62 (0.130)   |
| D <sub>1</sub>                             | 0.029                                |                                      | 0.031             |                |
| %doubles                                   | 7.39                                 | 9.61                                 | 10.3              | 11.8           |
| EOM-CCSD                                   | 6.18 (0.085)                         | 5.83 (0.081)                         | 4.88 (0.386)      | 4.92 (0.153)   |
| SAC-CI                                     | 6.06 (0.123)                         | 5.66 (0.099)                         |                   |                |
| CASPT2                                     | 6.14 (0.109) <sup>1</sup>            | 5.85 (0.067) <sup>1</sup>            |                   |                |
| Exp. Max.                                  | 5.93 <sup>2</sup> ,5.64 <sup>3</sup> | 5.48 <sup>2</sup> ,5.26 <sup>3</sup> |                   |                |

**Table S2.** Excitation energies (in eV) and oscillator strengths (in parenthesis) of thienothiophene and bithiophene which are depicted in the Figure 3 of the main text. States are described based on the orbital excitations with higher coefficients. Values are computed with the cc-pVQZ basis set, except for EOM-CCSD and SAC-CI of bithiophene (cc-pVTZ) and the CASPT2 results taken from the literature. We also list tuning parameters ( $\gamma$ ) of the range separated functional, the diagnostic parameters of ADC(2) and CC2 and available experimental absorption maxima.

|                                            | thienothiophene      |                        | bithiophene              |                          |
|--------------------------------------------|----------------------|------------------------|--------------------------|--------------------------|
|                                            | B <sub>u</sub> (H-L) | B <sub>u</sub> (H-1-L) | B (H-L)                  | B (H-2-L)                |
| PBE                                        | 4.48 (0.141)         | 4.80 (0.122)           | 3.80 (0.352)             | 4.63 (0.030)             |
| B3LYP                                      | 4.75 (0.216)         | 4.97 (0.089)           | 3.97 (0.371)             | 5.08 (0.055)             |
| PBE0                                       | 4.85 (0.226)         | 5.08 (0.090)           | 4.07 (0.380)             | 5.22 (0.064)             |
| TDA(PBE0)                                  | 5.04 (0.255)         | 5.29 (0.163)           | 4.29 (0.525)             | 5.31 (0.066)             |
| M06                                        | 4.71 (0.214)         | 4.95 (0.074)           | 3.97 (0.355)             | 5.13 (0.053)             |
| M06-2X                                     | 5.04 (0.249)         | 5.24 (0.097)           | 4.27 (0.372)             | 5.50 (0.107)             |
| M06-2X (H <sub>2</sub> O, IEF-PCM)         | 4.97 (0.330)         | 5.23 (0.126)           | 4.19 (0.450)             | 5.48 (0.159)             |
| $\omega$ B97x-D                            | 4.98 (0.249)         | 5.20 (0.093)           | 4.23 (0.378)             | 5.50 (0.105)             |
| LC-PBE                                     | 5.21 (0.245)         | 5.48 (0.135)           | 4.49 (0.378)             | 5.81 (0.153)             |
| LC-PBE*                                    | 5.00 (0.236)         | 5.18 (0.106)           | 4.24 (0.368)             | 5.39 (0.103)             |
| $\gamma$                                   | 0.27                 |                        | 0.245                    |                          |
| TDA-B2PLYP<br>(no perturbative correction) | 5.24                 | 5.53                   | 4.24                     | 5.75                     |
| TDA-B2PLYP                                 | 5.15 (0.324)         | 5.07 (0.121)           | 4.33 (0.504)             | 5.32 (0.085)             |
| TDHF                                       | 5.02 (0.203)         | 5.95 (0.199)           | 4.35 (0.371)             | 6.22 (0.154)             |
| CIS                                        | 5.34 (0.279)         | 6.18 (0.237)           | 4.62 (0.482)             | 6.40 (0.141)             |
| CIS(D)                                     | 5.51 (-)             | 5.00 (-)               | 4.67 (-)                 | 5.50 (-)                 |
| ADC(2)                                     | 5.30 (0.245)         | 4.96 (0.180)           | 4.44 (0.450)             | 5.39 (0.150)             |
| D <sub>1</sub>                             | 0.030                |                        | 0.033                    |                          |
| %doubles                                   | 9.05                 | 10.7                   | 9.52                     | 10.4                     |
| CC2                                        | 5.31 (0.212)         | 4.99 (0.165)           | 4.45 (0.416)             | 5.42 (0.114)             |
| D <sub>1</sub>                             | 0.030                |                        | 0.033                    |                          |
| %doubles                                   | 9.23                 | 10.9                   | 9.66                     | 10.6                     |
| EOM-CCSD                                   | 5.42 (0.187)         | 5.19 (0.177)           | 4.68 (0.407)             | 5.60 (0.135)             |
| SAC-CI                                     | 5.29 (0.253)         | 5.04 (0.278)           | 4.30 (0.494)             | 5.66 (0.185)             |
| CASPT2                                     |                      |                        | 4.11 (0.32) <sup>5</sup> | 5.14 (0.13) <sup>5</sup> |
| Exp. Max.                                  |                      |                        | 4.31 <sup>4</sup>        | 5.08 <sup>4</sup>        |

D<sub>1</sub> diagnostics of ADC(2) and CC2 measure the quality of the ground state wavefunction. Values smaller than 0.04 in case of ADC2 (MP2) and 0.05 in case of CC2 indicate that problems with the multireference character should not be expected. However, values as high as 0.10 and 0.15 may be acceptable.<sup>6</sup> Contributions of excitation levels (singles, doubles) may also be evaluated for each excited state.

Method should be trusted for values of %doubles smaller than 15,<sup>7</sup> otherwise problems with double excitations can be expected.

Despite the good agreement within wavefunction-based methods for the spectrum of thiophene, there is still a rigid shift of several tenths of eV with respect to experimentally measured absorption maxima. The discussion about the experimental challenges in assignment of thiophene excitations was recently reported in a combined theoretical and experimental study by Holland et al.<sup>8</sup> While it is now clear that  $A_1$  is the lowest lying transition, earlier experimental studies were ambiguous and even missassigned the relative position of the  $B_2$  and  $A_1$ . The unambiguous interpretation of the spectrum is still undermined by the fact that two peaks largely overlap and that the  $B_2$  state may be unbound. The same study by Holland et al. also confirms the good performance of the EOM-CCSD, SAC-CI and ADC(2) methods. Figure S1 illustrates the good agreement between our ADC(2) spectrum from the Wigner distribution and the experimental cross section from reference 8.

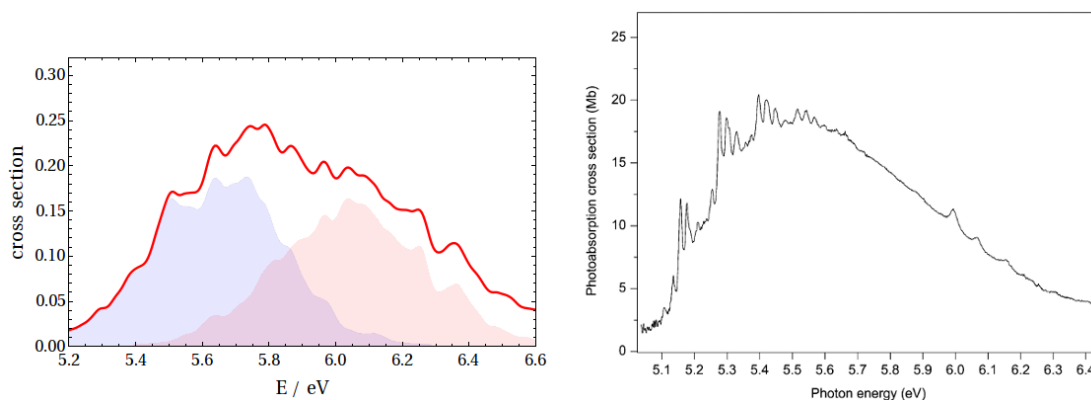

**Figure S1.** Photoabsorption spectra of thiophene computed with ADC(2) method from Wigner distribution (on the left) and the experimental cross section (on the right). The experimental spectrum was adapted from Reference 8 with permission from the PCCP Owner Societies.

## Plot of density differences.

**Figure S2.** Relaxed density differences between the ground state and the first two excited states of thiophene with PBE0 and ADC(2) (isovalue= $\pm 0.0005$ ). The cc-pVQZ basis set was used.

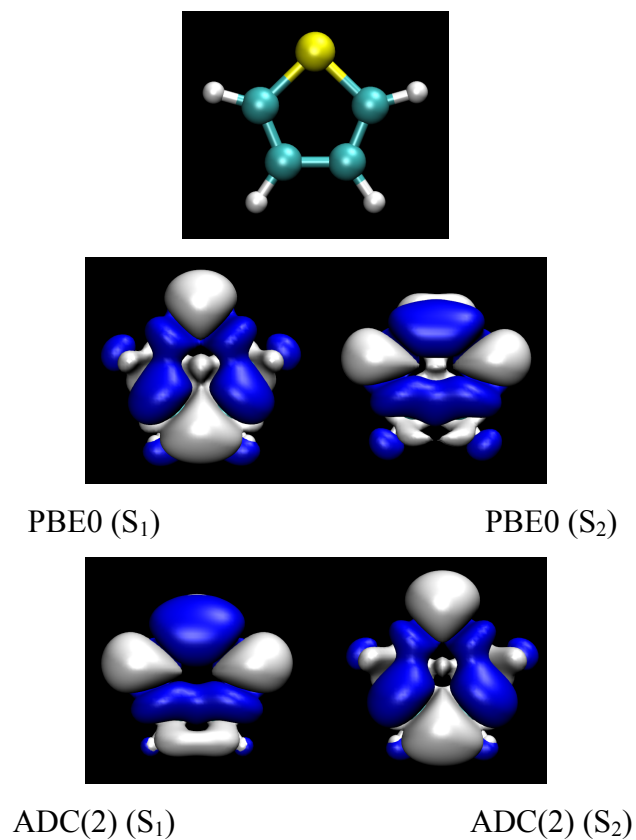

**Figure S3.** Relaxed density differences between the ground state and the first two excited states of thienothiophene with PBE0, M06-2X, LC-PBE\*, CIS and ADC(2) (isovalue= $\pm 0.0002$ ). The cc-pVQZ basis set was used.

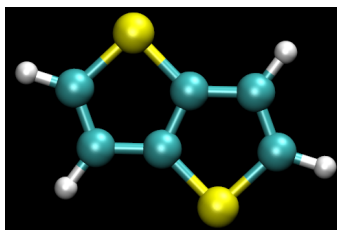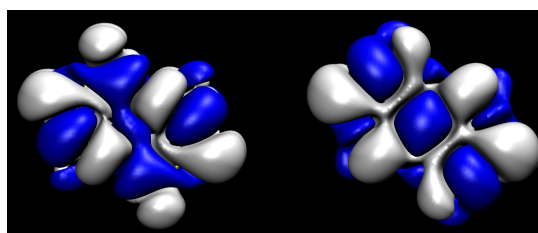

PBE0 (S<sub>1</sub>)

PBE0 (S<sub>2</sub>)

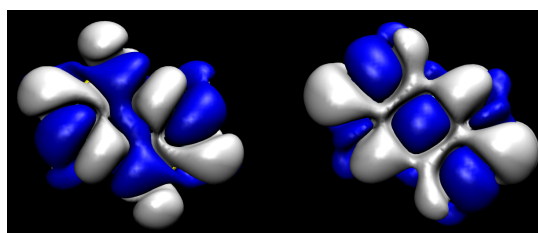

M06-2X (S<sub>1</sub>)

M06-2X (S<sub>2</sub>)

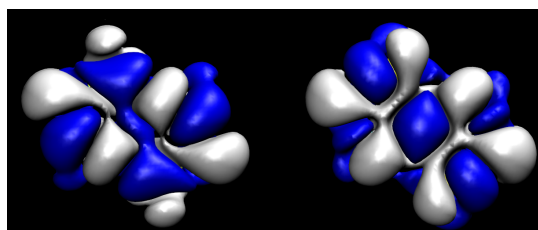

LC-PBE\* (S<sub>1</sub>)

LC-PBE\* (S<sub>2</sub>)

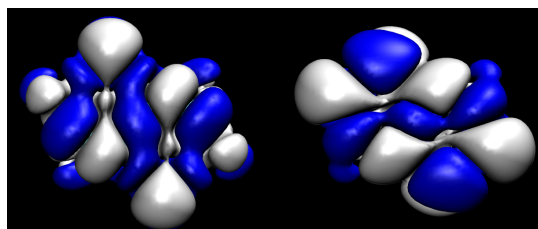

CIS (S<sub>1</sub>)

CIS (S<sub>2</sub>)

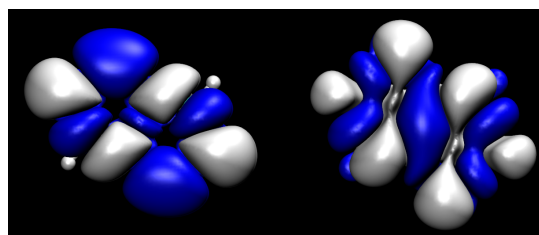

ADC(2) ( $S_1$ )

ADC(2) ( $S_2$ )

**Figure S4.** Relaxed density differences between the ground state and the first two excited states of dithienothiophene with PBE0 and ADC(2) (isovalue= $\pm 0.0002$ ). The cc-pVQZ basis set was used.

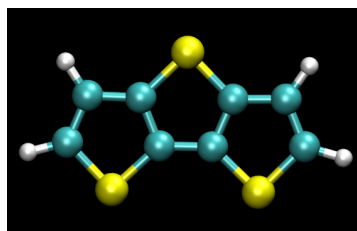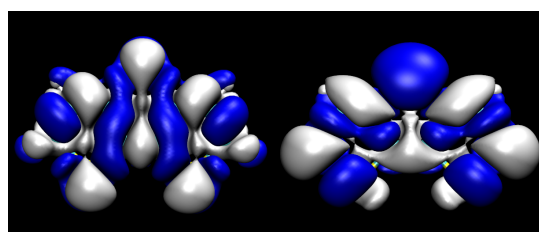

PBE0 ( $S_1$ )

PBE0 ( $S_2$ )

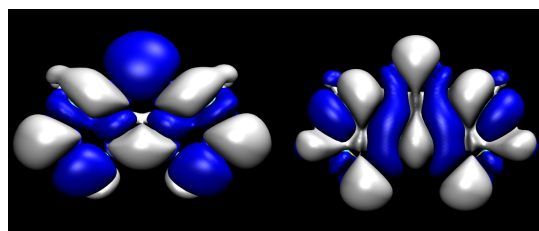

ADC(2) ( $S_1$ )

ADC(2) ( $S_2$ )



**Figure S5.** Relaxed density differences between the ground state and the  $S_1$  and  $S_3$  states of bithiophene with PBE0 and ADC(2) (isovalue= $\pm 0.0005$ ). The cc-pVQZ basis set was used.

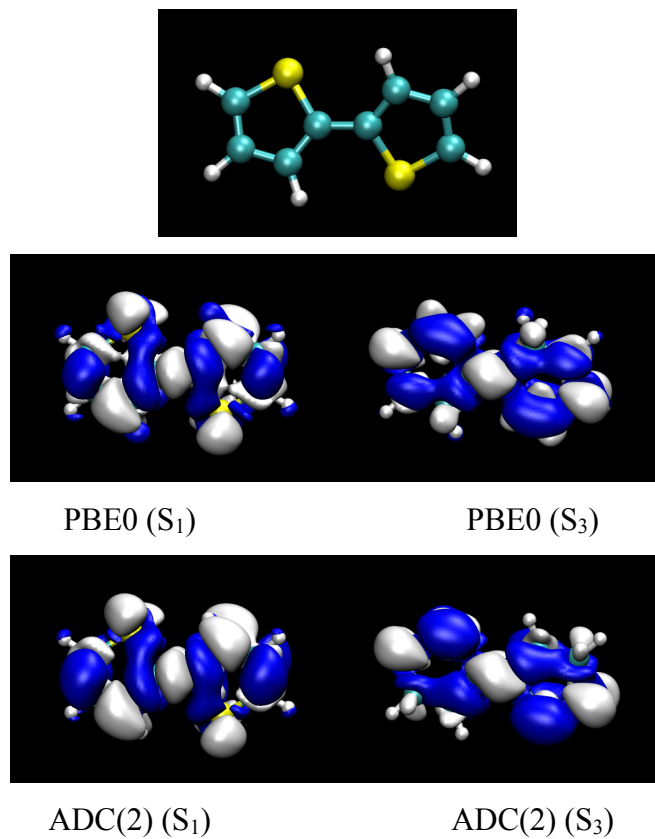

## Structural data for ground and excited state geometries.

Cartesian coordinates (Å) of optimized ground state minima

### Thiophene – ground state

|   |           |           |           |
|---|-----------|-----------|-----------|
| C | -0.004024 | -1.235762 | 0.000020  |
| C | -1.265928 | -0.712283 | -0.000011 |
| C | -1.265928 | 0.712283  | 0.000004  |
| C | -0.004024 | 1.235762  | 0.000013  |
| S | 1.198141  | 0.000000  | 0.000036  |
| H | 0.289783  | -2.277537 | 0.000028  |
| H | -2.163122 | -1.322094 | -0.000029 |
| H | -2.163122 | 1.322094  | -0.000006 |
| H | 0.289783  | 2.277537  | 0.000015  |

### Dithienothiophene – ground state

|   |           |           |          |
|---|-----------|-----------|----------|
| C | 9.934087  | 12.206173 | 0.630334 |
| C | 8.646135  | 12.657907 | 0.616158 |
| C | 7.731496  | 11.611002 | 0.910264 |
| C | 8.343715  | 10.387296 | 1.141555 |
| H | 8.375589  | 13.686565 | 0.405583 |
| C | 7.407212  | 9.361240  | 1.432489 |
| C | 6.098093  | 9.821404  | 1.417807 |
| C | 5.138038  | 8.814311  | 1.706182 |
| C | 5.739333  | 7.610292  | 1.933928 |
| H | 4.064740  | 8.963325  | 1.744837 |
| S | 10.064150 | 10.512070 | 0.998579 |
| H | 10.835544 | 12.775576 | 0.443421 |
| S | 5.989765  | 11.526893 | 1.045442 |
| S | 7.471890  | 7.671979  | 1.804289 |
| H | 5.262242  | 6.669026  | 2.175222 |

### Thienothiophene – ground state

|   |           |           |           |
|---|-----------|-----------|-----------|
| C | -5.547863 | -0.440275 | 0.354590  |
| C | -5.134714 | -1.668850 | -0.071224 |
| C | -3.757583 | -1.872855 | 0.220987  |
| S | -4.287600 | 0.487575  | 1.112412  |
| C | -3.153003 | -0.800555 | 0.860424  |
| C | -1.775872 | -1.004561 | 1.152636  |
| C | -1.362723 | -2.233136 | 0.726821  |
| S | -2.622987 | -3.160986 | -0.030999 |
| H | -6.538780 | -0.012656 | 0.267878  |
| H | -5.785707 | -2.381443 | -0.565146 |
| H | -1.124879 | -0.291969 | 1.646559  |
| H | -0.371809 | -2.660758 | 0.813541  |

### Bithiophene – ground state

|   |           |           |           |
|---|-----------|-----------|-----------|
| C | -5.068050 | -0.028063 | -0.060010 |
| C | -4.915273 | -1.382846 | 0.021812  |
| C | -3.560177 | -1.771434 | 0.192768  |
| C | -2.692817 | -0.706857 | 0.238609  |
| S | -3.556211 | 0.793274  | 0.055357  |
| H | -5.981866 | 0.538811  | -0.183211 |
| H | -5.745349 | -2.079138 | -0.029944 |
| H | -3.232253 | -2.801746 | 0.300740  |
| C | -1.253529 | -0.714428 | 0.400515  |
| C | -0.427591 | 0.303013  | 0.813278  |
| C | 0.942284  | -0.068861 | 0.853206  |
| C | 1.147364  | -1.364257 | 0.471987  |
| S | -0.329110 | -2.145377 | 0.043623  |
| H | -0.799939 | 1.282784  | 1.099801  |
| H | 1.743486  | 0.594623  | 1.160426  |
| H | 2.081472  | -1.908164 | 0.415563  |

### Terthiophene – ground state

|   |           |          |           |
|---|-----------|----------|-----------|
| C | 0.409094  | 1.812473 | -1.308225 |
| C | 1.828324  | 1.796043 | -1.322924 |
| C | 2.367671  | 1.759477 | -0.068482 |
| H | -0.206508 | 1.861813 | -2.202276 |
| H | 2.426954  | 1.818305 | -2.227144 |
| S | 1.148946  | 1.730519 | 1.151081  |
| C | -0.120466 | 1.787911 | -0.039494 |
| C | -1.508544 | 1.794886 | 0.363547  |
| C | -2.050251 | 2.083993 | 1.593395  |
| S | -2.761373 | 1.385451 | -0.774874 |
| C | -3.461615 | 2.000195 | 1.619761  |
| H | -1.445749 | 2.376453 | 2.447552  |
| C | -4.010694 | 1.646426 | 0.410258  |
| H | -4.064154 | 2.220446 | 2.496694  |
| C | -5.402174 | 1.474430 | 0.058973  |
| C | -5.976700 | 1.429575 | -1.189415 |
| S | -6.611929 | 1.274967 | 1.295421  |
| C | -7.383706 | 1.246080 | -1.152019 |
| H | -5.404076 | 1.545903 | -2.105543 |
| C | -7.869061 | 1.153131 | 0.121400  |
| H | -8.013226 | 1.192579 | -2.033664 |
| H | -8.894093 | 1.018002 | 0.441676  |
| H | 3.412571  | 1.745844 | 0.213540  |

### Furan – ground state

|   |          |           |           |
|---|----------|-----------|-----------|
| C | 0.000000 | -0.348270 | 1.088780  |
| C | 0.000000 | 0.959220  | 0.715540  |
| C | 0.000000 | 0.959220  | -0.715540 |
| C | 0.000000 | -0.348270 | -1.088780 |
| H | 0.000000 | -0.846940 | 2.047630  |
| H | 0.000000 | 1.814880  | 1.376580  |
| H | 0.000000 | 1.814880  | -1.376580 |
| H | 0.000000 | -0.846940 | -2.047630 |
| O | 0.000000 | -1.158410 | 0.000000  |

### Furofuran – ground state

|   |           |           |          |
|---|-----------|-----------|----------|
| C | 2.063090  | -0.032500 | 0.000000 |
| C | 1.307370  | -1.173260 | 0.000000 |
| O | 1.307370  | 1.113560  | 0.000000 |
| H | 3.132600  | 0.122140  | 0.000000 |
| H | 1.683500  | -2.186300 | 0.000000 |
| O | -1.307370 | -1.113560 | 0.000000 |
| C | 0.025070  | 0.681740  | 0.000000 |
| C | -0.025070 | -0.681740 | 0.000000 |
| C | -1.307370 | 1.173260  | 0.000000 |
| H | -1.683500 | 2.186300  | 0.000000 |
| C | -2.063090 | 0.032500  | 0.000000 |
| H | -3.132600 | -0.122140 | 0.000000 |

### Cartesian coordinates (Å) of excited state ( $S_1$ ) optimized geometries

#### Thiophene – minimum a (PBE0)

|   |           |           |           |
|---|-----------|-----------|-----------|
| C | 0.010663  | -1.269595 | 0.532071  |
| C | -1.230376 | -0.691025 | 0.097647  |
| C | -1.279410 | 0.744060  | 0.141827  |
| C | -0.041478 | 1.293957  | 0.133706  |
| S | 1.004383  | -0.088227 | -0.314169 |
| H | 0.264323  | -2.296128 | 0.288706  |
| H | -2.053139 | -1.301379 | -0.261655 |
| H | -2.206190 | 1.301416  | 0.208362  |
| H | 0.324205  | 2.299268  | 0.248728  |

#### Thiophene – minimum a (M06-2X)

|   |           |           |           |
|---|-----------|-----------|-----------|
| C | 0.013182  | -1.264190 | 0.510757  |
| C | -1.242668 | -0.687842 | 0.096731  |
| C | -1.283649 | 0.745523  | 0.146104  |
| C | -0.043639 | 1.288393  | 0.129884  |
| S | 1.012141  | -0.092366 | -0.308335 |
| H | 0.273082  | -2.294284 | 0.309485  |
| H | -2.053444 | -1.301334 | -0.276046 |
| H | -2.204609 | 1.306522  | 0.224247  |
| H | 0.322586  | 2.291926  | 0.242395  |

Thiophene – minimum a (ADC(2))

|   |           |           |           |
|---|-----------|-----------|-----------|
| C | -0.074058 | -1.381002 | -0.007198 |
| C | -1.297082 | -0.782362 | -0.408073 |
| C | -1.297163 | 0.639367  | -0.406884 |
| C | -0.074203 | 1.237469  | -0.005019 |
| S | 1.041518  | -0.071278 | -0.522578 |
| H | 0.234415  | -2.377430 | -0.289742 |
| H | -2.172849 | -1.366304 | -0.656879 |
| H | -2.173002 | 1.223624  | -0.654699 |
| H | 0.234167  | 2.234402  | -0.285893 |

Thiophene – minimum b (PBE0)

|   |           |           |           |
|---|-----------|-----------|-----------|
| C | 0.012978  | -1.191234 | 0.277179  |
| C | -1.334586 | -0.683180 | 0.247457  |
| C | -1.336292 | 0.677982  | 0.144134  |
| C | 0.010297  | 1.187747  | 0.097792  |
| S | 1.149397  | -0.042480 | -0.371178 |
| H | 0.347218  | -1.996033 | 0.928848  |
| H | -2.204128 | -1.308855 | 0.399287  |
| H | -2.207341 | 1.317297  | 0.199600  |
| H | 0.342995  | 2.080428  | 0.623619  |

Thiophene – minimum b (M06-2X)

|   |           |           |           |
|---|-----------|-----------|-----------|
| C | 0.014340  | -1.187930 | 0.278069  |
| C | -1.337857 | -0.682739 | 0.240853  |
| C | -1.339179 | 0.676230  | 0.139026  |
| C | 0.011997  | 1.183998  | 0.100194  |
| S | 1.140253  | -0.045277 | -0.405405 |
| H | 0.354739  | -1.966401 | 0.953681  |
| H | -2.205837 | -1.307015 | 0.393384  |
| H | -2.208462 | 1.314533  | 0.196489  |
| H | 0.350544  | 2.056275  | 0.650446  |

Thienothiophene (PBE0)

|   |           |           |           |
|---|-----------|-----------|-----------|
| C | -5.457002 | -0.359618 | 0.239649  |
| C | -5.056477 | -1.665316 | -0.101888 |
| C | -3.869158 | -2.015327 | 0.501539  |
| S | -4.370763 | 0.437606  | 1.325997  |
| C | -3.234224 | -0.904044 | 1.169991  |
| C | -1.862397 | -1.018252 | 1.206399  |
| C | -1.425696 | -2.277874 | 0.754240  |
| S | -2.716094 | -3.336082 | 0.295430  |
| H | -6.349812 | 0.144334  | -0.097994 |
| H | -5.628963 | -2.290998 | -0.772007 |
| H | -1.176168 | -0.246945 | 1.526419  |
| H | -0.402215 | -2.614734 | 0.690282  |

### Thienothiophene (M06-2X)

|   |           |           |           |
|---|-----------|-----------|-----------|
| C | -5.411601 | -0.353279 | 0.219944  |
| C | -5.028541 | -1.666054 | -0.089079 |
| C | -3.908375 | -2.066856 | 0.610728  |
| S | -4.400355 | 0.403168  | 1.410115  |
| C | -3.267894 | -0.945517 | 1.285009  |
| C | -1.892276 | -1.019981 | 1.199686  |
| C | -1.452252 | -2.259994 | 0.715677  |
| S | -2.741525 | -3.371615 | 0.379657  |
| H | -6.250007 | 0.179647  | -0.198371 |
| H | -5.557342 | -2.270379 | -0.810417 |
| H | -1.211767 | -0.221840 | 1.454692  |
| H | -0.427035 | -2.554550 | 0.560418  |

### Thienothiophene (ADC(2))

|   |           |           |           |
|---|-----------|-----------|-----------|
| C | -0.506077 | 0.293742  | 0.222888  |
| C | -0.311251 | -0.037682 | 1.561718  |
| S | 0.173686  | 1.821769  | -0.173205 |
| C | 0.953022  | 1.991660  | 1.442518  |
| C | 0.365146  | 0.955951  | 2.322329  |
| C | 2.373947  | 1.968951  | 1.504186  |
| S | 1.662211  | 0.419117  | 3.452030  |
| C | 2.894362  | 1.193094  | 2.537373  |
| H | -0.651005 | -0.978717 | 1.973721  |
| H | -1.093591 | -0.253860 | -0.498181 |
| H | 3.928860  | 1.130558  | 2.838847  |
| H | 3.011743  | 2.503112  | 0.812369  |

### Dithienothiophene (PBE0)

|   |           |           |          |
|---|-----------|-----------|----------|
| C | 9.919322  | 12.150933 | 0.548947 |
| C | 8.613947  | 12.637574 | 0.618574 |
| C | 7.708159  | 11.635326 | 0.903303 |
| C | 8.321170  | 10.347080 | 1.056832 |
| H | 8.370880  | 13.679100 | 0.464097 |
| C | 7.419676  | 9.359468  | 1.337155 |
| C | 6.069950  | 9.840641  | 1.412303 |
| C | 5.153723  | 8.846714  | 1.692861 |
| C | 5.767778  | 7.602771  | 1.838164 |
| H | 4.086768  | 8.985551  | 1.793537 |
| S | 10.053684 | 10.446276 | 0.833233 |
| H | 10.811692 | 12.721265 | 0.342798 |
| S | 5.964318  | 11.571832 | 1.121943 |
| S | 7.488426  | 7.635916  | 1.630311 |
| H | 5.283055  | 6.664641  | 2.059649 |

### Dithienothiophene (M06-2X)

|   |           |           |          |
|---|-----------|-----------|----------|
| C | 9.912828  | 12.140944 | 0.511327 |
| C | 8.611638  | 12.631334 | 0.594818 |
| C | 7.711997  | 11.648457 | 0.956839 |
| C | 8.328122  | 10.358364 | 1.128982 |
| H | 8.365337  | 13.663578 | 0.400179 |
| C | 7.429366  | 9.373823  | 1.409215 |
| C | 6.072425  | 9.852296  | 1.467097 |
| C | 5.152993  | 8.842210  | 1.668876 |
| C | 5.766366  | 7.598269  | 1.799260 |
| H | 4.083663  | 8.972779  | 1.728551 |
| S | 10.057010 | 10.445965 | 0.860351 |
| H | 10.798287 | 12.704134 | 0.268304 |
| S | 5.968303  | 11.596001 | 1.219499 |
| S | 7.496568  | 7.641117  | 1.658883 |
| H | 5.277649  | 6.655819  | 1.981525 |

#### Dithienothiophene (ADC(2))

|   |           |           |          |
|---|-----------|-----------|----------|
| C | 9.882434  | 12.090064 | 0.412217 |
| C | 8.579453  | 12.601728 | 0.531794 |
| C | 7.718954  | 11.688157 | 1.113071 |
| C | 8.352887  | 10.396913 | 1.336174 |
| H | 8.318913  | 13.602956 | 0.222714 |
| C | 7.451742  | 9.409670  | 1.616128 |
| C | 6.077633  | 9.890029  | 1.622858 |
| C | 5.160007  | 8.855591  | 1.593710 |
| C | 5.784114  | 7.600188  | 1.684976 |
| H | 4.087567  | 8.967344  | 1.536692 |
| S | 10.053753 | 10.444150 | 0.944235 |
| H | 10.753501 | 12.622007 | 0.062903 |
| S | 5.996567  | 11.645928 | 1.487006 |
| S | 7.520371  | 7.668728  | 1.731129 |
| H | 5.294654  | 6.641637  | 1.758099 |

#### Bithiophene (PBE0)

|   |           |           |           |
|---|-----------|-----------|-----------|
| C | -5.041520 | -0.026361 | 0.102854  |
| C | -4.865713 | -1.396231 | -0.052575 |
| C | -3.546582 | -1.800082 | 0.046828  |
| C | -2.664110 | -0.712243 | 0.286875  |
| S | -3.567007 | 0.808038  | 0.378767  |
| H | -5.970451 | 0.521401  | 0.066595  |
| H | -5.694436 | -2.067276 | -0.233439 |
| H | -3.195840 | -2.818950 | -0.042748 |
| C | -1.292272 | -0.720194 | 0.440770  |
| C | -0.409454 | 0.367625  | 0.679882  |
| C | 0.909987  | -0.036009 | 0.775633  |
| C | 1.085648  | -1.405884 | 0.619181  |
| S | -0.389387 | -2.240352 | 0.346633  |
| H | -0.760204 | 1.386284  | 0.771411  |
| H | 1.739036  | 0.635038  | 0.954773  |
| H | 2.014743  | -1.953472 | 0.653079  |

#### Bithiophene (M06-2X)

|   |           |           |           |
|---|-----------|-----------|-----------|
| C | -5.037451 | -0.026127 | 0.104486  |
| C | -4.863456 | -1.396203 | -0.051383 |
| C | -3.544795 | -1.803472 | 0.045637  |
| C | -2.661195 | -0.712024 | 0.285627  |
| S | -3.563958 | 0.810846  | 0.379012  |
| H | -5.966275 | 0.518344  | 0.068603  |
| H | -5.692621 | -2.063957 | -0.231077 |
| H | -3.193206 | -2.820334 | -0.045321 |
| C | -1.294752 | -0.720314 | 0.438707  |
| C | -0.411152 | 0.371135  | 0.678695  |
| C | 0.907511  | -0.036129 | 0.775691  |
| C | 1.081509  | -1.406203 | 0.619811  |
| S | -0.391985 | -2.243179 | 0.345302  |
| H | -0.762746 | 1.387994  | 0.769674  |
| H | 1.736676  | 0.631627  | 0.955380  |
| H | 2.010336  | -1.950671 | 0.655677  |

### Bithiophene (ADC(2))

|   |           |           |           |
|---|-----------|-----------|-----------|
| C | -5.040262 | -0.020099 | 0.105360  |
| C | -4.866963 | -1.405869 | -0.053067 |
| C | -3.551244 | -1.820214 | 0.042092  |
| C | -2.660928 | -0.720207 | 0.283887  |
| S | -3.560675 | 0.805313  | 0.378225  |
| H | -5.967930 | 0.528507  | 0.071151  |
| H | -5.703111 | -2.066219 | -0.232233 |
| H | -3.198618 | -2.837224 | -0.048969 |
| C | -1.294919 | -0.711970 | 0.439512  |
| C | -0.404585 | 0.388010  | 0.681357  |
| C | 0.910993  | -0.026516 | 0.777689  |
| C | 1.084189  | -1.412372 | 0.619896  |
| S | -0.395316 | -2.237641 | 0.346176  |
| H | -0.757065 | 1.405165  | 0.771353  |
| H | 1.747123  | 0.633777  | 0.957148  |
| H | 2.011750  | -1.961106 | 0.654944  |



## Excitation energies and spectrum of terthiophene.

Table S3. Excitation energies (in eV) and oscillator strengths (in parenthesis) of the two lowest bright states of terthiophene. Values are computed with the cc-pVQZ basis set.

|                | terthiophene |              |
|----------------|--------------|--------------|
|                | A''          | A'           |
| PBE0           | 3.36 (0.740) | 5.02 (0.080) |
| M06-2X         | 3.60 (0.730) | 5.41 (0.136) |
| CIS            | 3.95 (0.883) | 6.39 (0.130) |
| CIS(D)         | 3.99 (-)     | 5.59 (-)     |
| ADC2           | 3.75 (0.878) | 5.36 (0.154) |
| D <sub>1</sub> | 0.035        |              |
| %doubles       | 10.5         | 10.7         |

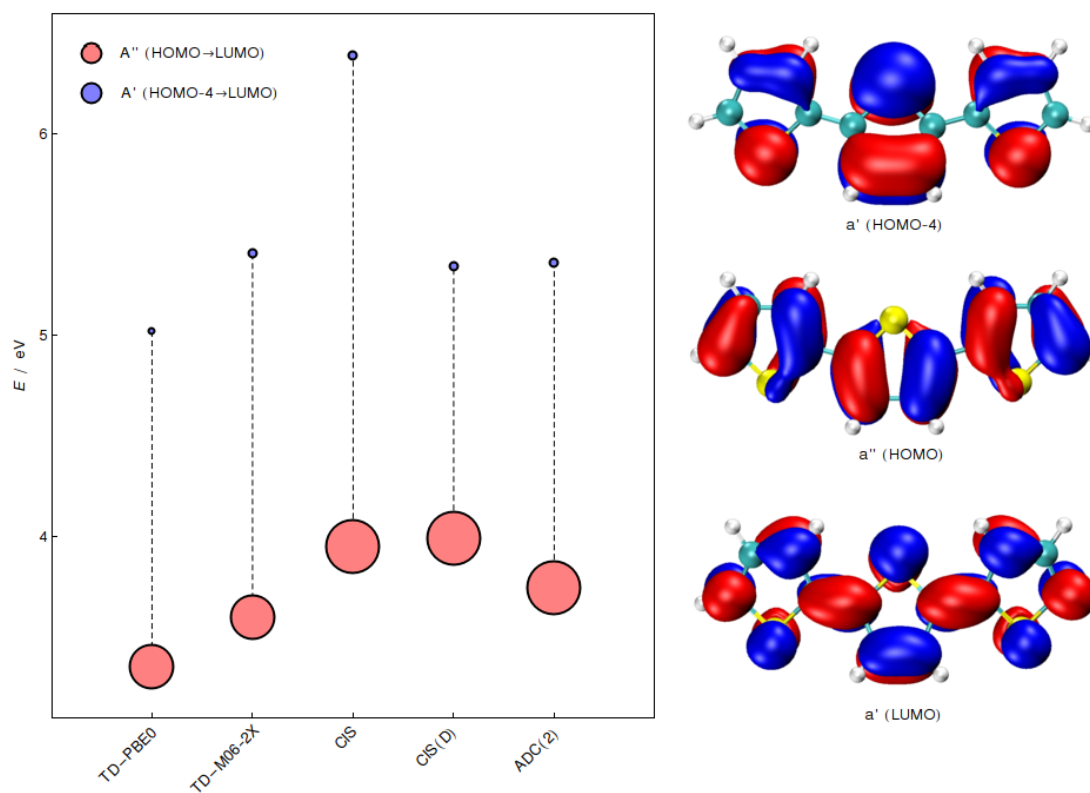

**Figure S6.** Excitation energies of the two lowest bright  $\pi\pi^*$  states of terthiophene. Radii of the circles are proportional to the oscillator strengths while colors denote character. Numerical values are taken from table S3.

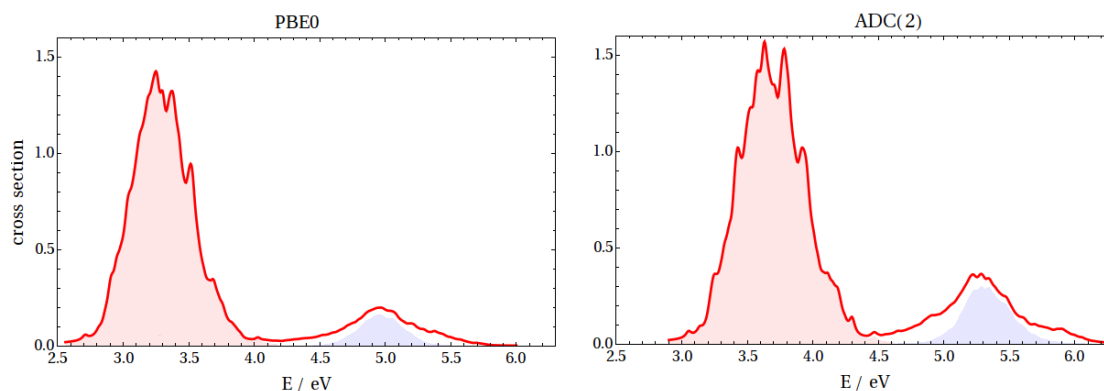

**Figure S7.** Photoabsorption spectra computed from Wigner distribution (red line) of terthiophene (second row). The spectra were decomposed into contributions from  $S_1$  and  $S_6+S_7+S_8$ . The states represented by the red-shaded areas have a dominant HOMO $\rightarrow$ LUMO character, while states depicted as blue are dominated by HOMO-4 $\rightarrow$ LUMO excitations. The cc-pVTZ basis set was used.

### Excited state geometries of bithiophene.

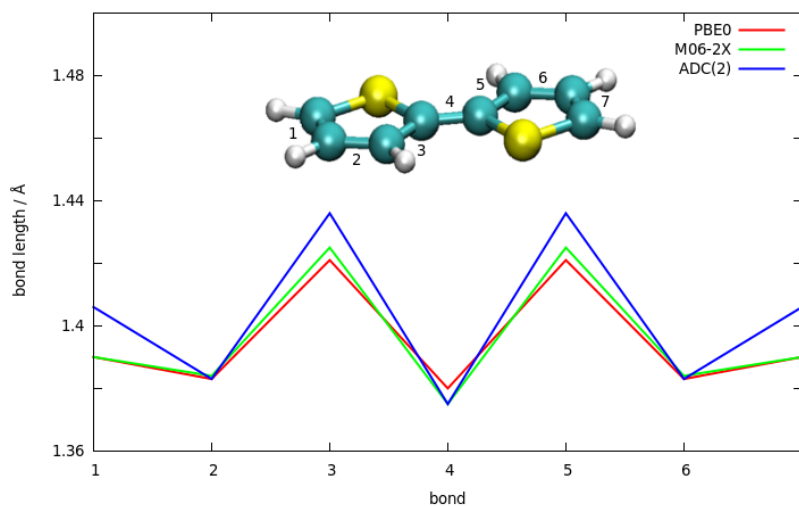

**Figure S8.** CC bond length alternations of the planar  $S_1$  minimum of bithiophene. The cc-pVTZ basis set was used.

### Excitation energies of furan and furofuran.

**Table S4.** Excitation energies (in eV) and oscillator strengths (in parenthesis) of furan and furofuran. Values are computed with the cc-pVQZ basis set.

|                | furan          |                | furofuran            |                        |
|----------------|----------------|----------------|----------------------|------------------------|
|                | B <sub>2</sub> | A <sub>1</sub> | B <sub>u</sub> (H-L) | B <sub>u</sub> (H-1-L) |
| PBE0           | 6.28 (0.155)   | 6.88 (0)       | 5.27 (0.354)         | 6.39 (0.039)           |
| M06-2X         | 6.39 (0.161)   | 7.15 (0)       | 5.43 (0.366)         | 6.71 (0.056)           |
| CIS            | 6.56 (0.203)   | 8.15 (0.006)   | 5.67 (0.507)         | 7.92 (0.075)           |
| CIS(D)         | 6.82 (-)       | 6.87 (-)       | 5.87 (-)             | 6.38 (-)               |
| ADC2           | 6.67 (0.188)   | 6.83 (0.002)   | 5.63 (0.410)         | 6.36 (0.098)           |
| D <sub>1</sub> | 0.034          |                | 0.037                |                        |
| %doubles       | 6.37           | 10.38          | 8.32                 | 11.03                  |

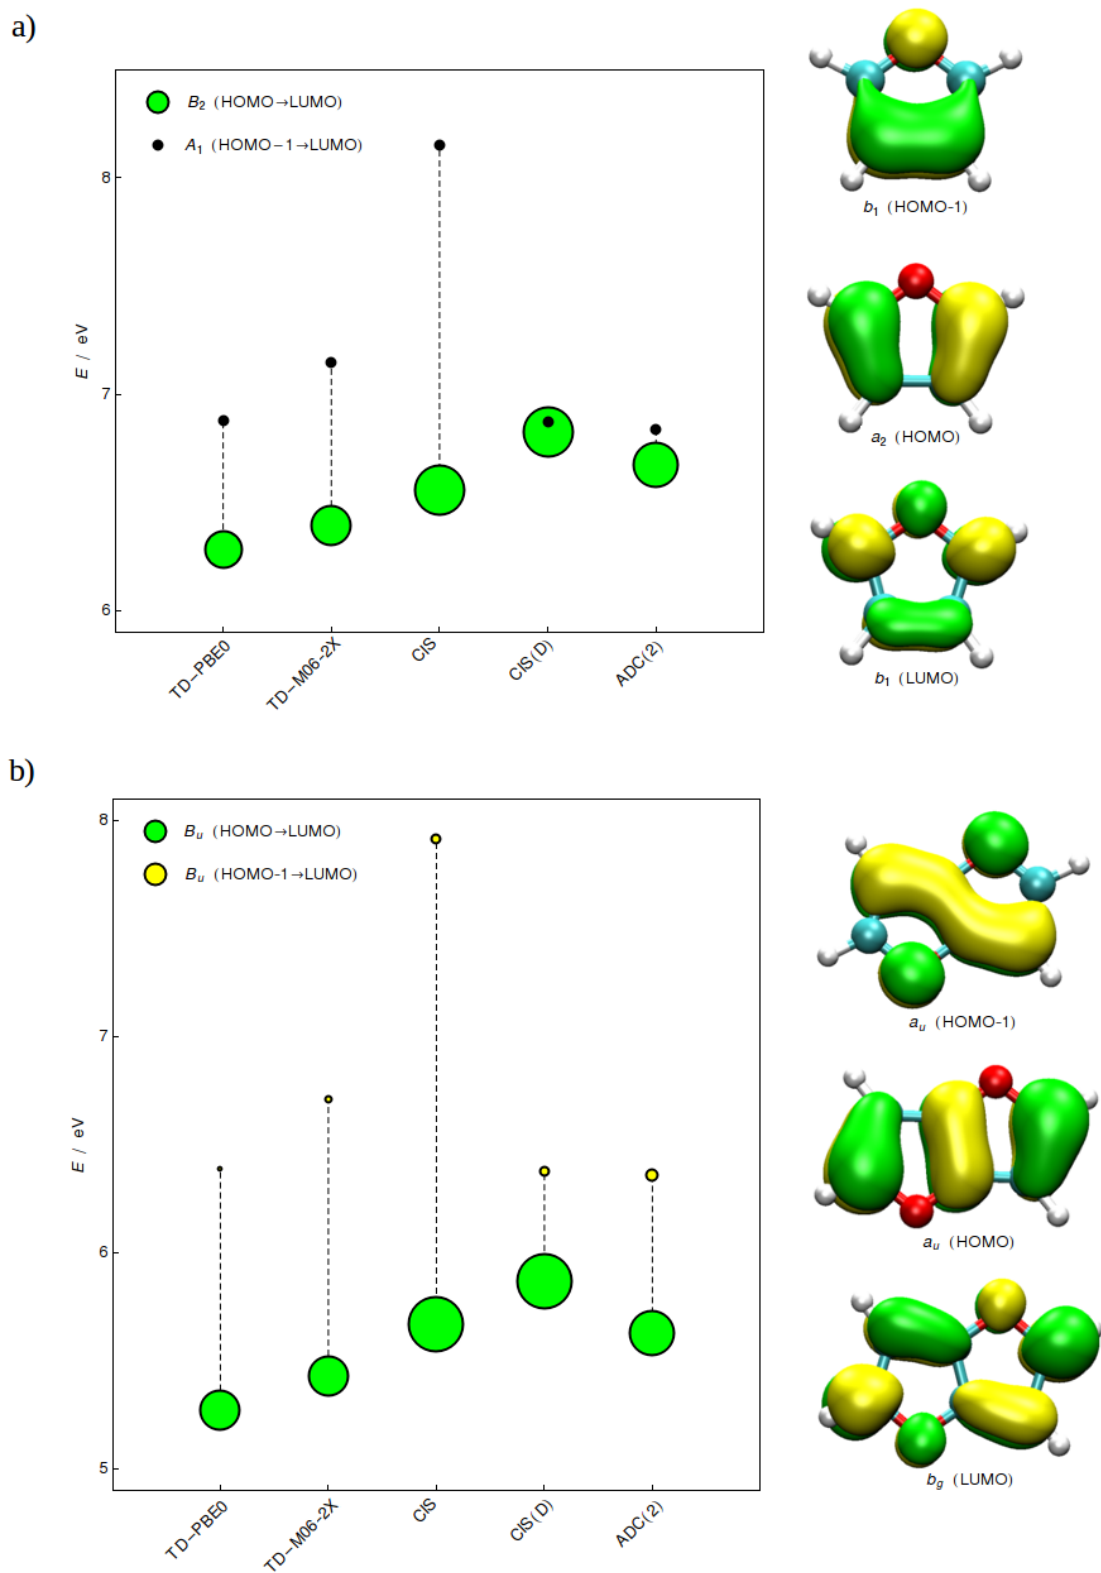

**Figure S9.** Excitation energies of the two lowest bright  $\pi\pi^*$  states of: a) furan and b) furofuran. Radii of the circles are proportional to the oscillator strengths while colors denote character. The states depicted in black have an oscillator strength close to zero.

Numerical values are taken from Table S4.

## References

- (1) Stenrup, M. Theoretical Study of the Radiationless Deactivation Mechanisms of Photo-excited Thiophene. *Chem. Phys.* **2012**, *397*, 18-25.
- (2) Flicker, W. M.; Mosher, O. A.; Kuppermann, A. Electron Impact Investigation of Electronic Excitations in Furan, Thiophene and Pyrrole. *J. Chem. Phys.* **1976**, *64*, 1315-1321.
- (3) Håkansson, R.; Nordén, B.; Thulstrup, E. W. Magnetic Circular Dichroism of Heterocycles: Thiophene. *Chem. Phys. Lett.* **1977**, *50*, 305-308.
- (4) Bellétete, M.; LeClerc, M.; Durocher, G. Potentialities of Semiempirical Calculations (AMPAC and INDO/S) in Determining the Conformation and Electronic Properties of 2,2'-Bithiophene: A New Joint Experimental and Theoretical Approach. *J. Phys. Chem.* **1994**, *98*, 9450-9456.
- (5) Andrzejak, M; Witek, H. A. The Elusive Excited States of Bithiophene: a CASPT2 Detective Story. *Theor. Chem. Acc.* **2011**, *129*, 161-172.
- (6) Köhn, A; Hättig, C. Analytic Gradients for Excited States in the Coupled-Cluster Model CC2 Employing the Resolution-of-the-Identity Approximation. *J. Chem. Phys.* **2003**, *119*, 5021-5036.
- (7)[http://www.turbomolembh.com/manuals/version\\_6\\_5/Documentation\\_html/node\\_212.html](http://www.turbomolembh.com/manuals/version_6_5/Documentation_html/node_212.html)
- (8) Holland, D. M. P.; Trofimov, A.B.; Seddon, E. A.; Gromov, E. V.; Korona, T.; de Oliveira, N.; Archer, L. E.; Joyeux, D.; Nahon, L. Excited Electronic States of Thiophene: High Resolution Photoabsorption Fourier Transform Spectroscopy and Ab Initio Calculations. *Phys. Chem. Chem. Phys.* **2014**, *16*, 21629-21644.
